# Supplementary material for: Listeria monocytogenes Traffics from Maternal Organs to the Placenta and Back
Source: PubMed Central journal article supplement (PMC1483233; doi:10.1371/journal.ppat.0020066), 2006-06-30
Supplement: ppat.0020066.sg001.pdf [file ppat.0020066.sg001.pdf]

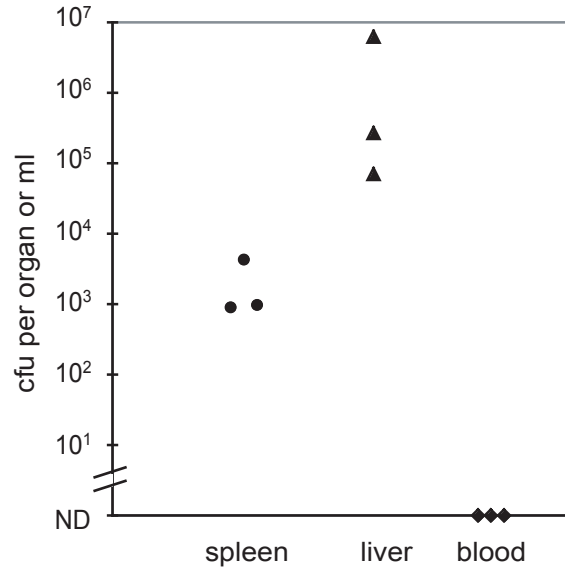

**Fig. S1**
